# Supplementary material for: Circulating MicroRNAs Regulating DNA Damage Response and Responsiveness to Cisplatin in the Prognosis of Patients with Non-Small Cell Lung Cancer Treated with First-Line Platinum Chemotherapy
Source: Cancers (Basel). 2020 May 19;12(5):1282. doi: 10.3390/cancers12051282 (PMC7281609; doi:10.3390/cancers12051282)
Supplement: Supplementary file 1 [file cancers-12-01282-s001.pdf]

# Supplementary Material: Circulating MicroRNAs Regulating DNA Damage Response and Responsiveness to Cisplatin in the Prognosis of Patients with Non-Small Cell Lung Cancer Treated with First-Line Platinum Chemotherapy

Chara Papadaki, Alexia Monastiriotti, Konstantinos Rounis, Dimitrios Makrakis, Konstantinos Kalbakis, Christofors Nikolaou, Dimitrios Mavroudis and Sofia Agelaki

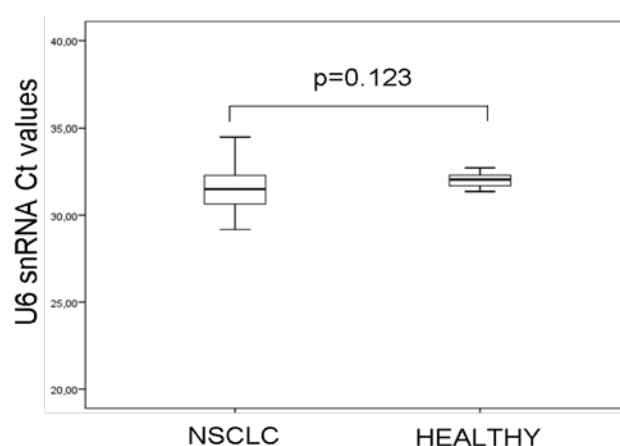

**Figure S1.** U6 snRNA expression levels between NSCLC patients and healthy donors. Mann-Whitney test was used to determine statistically significant differences and the results were displayed on box plots. Horizontal line depicts the median Ct value, whereas the length of the boxes is the interquartile range that represents values between the 75<sup>th</sup> and 25<sup>th</sup> percentiles of individual Ct values. *P* values are shown.

**Table S1.** Assay ID for each miRNA used in the study.

| Name            | Assay ID |
|-----------------|----------|
| has-miR-21-5p   | 000397   |
| has-miR-128a-3p | 002216   |
| has-miR-155-5p  | 002623   |
| has-miR-181A-5p | 000480   |
| U6 snRNA        | 001973   |
| cel-miR-39-3p   | 000200   |
